# Supplementary material for: A Transcription Factor Regulates Gene Expression in Chloroplasts
Source: MDPI journal article supplement (doi:10.3390/ijms22136769), 2021-06-24
Supplement: s1 [file s1]

## SUPPORTING INFORMATION

```

      *      20      *      40      *      60      *      80
AT5G63790.1 : -----MDFALFSSISIFEINHKDPPIRRFIKTQNRILSTRKQGGTFPKMAELNLPAGFRFHTDEELVKFYLCR : 70
AT5G63790.2 : MNLDPFVYKSSMDFALFSSISIFEINHKDPPIRRFIKTQNRILSTRKQGGTFPKMAELNLPAGFRFHTDEELVKFYLCR : 80
      *      100     *      120     *      140     *      160
AT5G63790.1 : RCASEPINVPVIAEIDLKFNWELPEMALYGEKEWYFFSHRDRKYPNGSRPNRAAGTGYWKATGADKPIGKPKTLGIKK : 150
AT5G63790.2 : RCASEPINVPVIAEIDLKFNWELPEMALYGEKEWYFFSHRDRKYPNGSRPNRAAGTGYWKATGADKPIGKPKTLGIKK : 160
      *      180     *      200     *      220     *      240
AT5G63790.1 : ALVFIYAGKAPKGIKTNWIMHEYRLANVDRSASTNKKNNLRLLDDWVLCRIYNNKGTMEKYLPAAAEKPTEKMSTSDSRCSS : 230
AT5G63790.2 : ALVFIYAGKAPKGIKTNWIMHEYRLANVDRSASTNKKNNLRLLDDWVLCRIYNNKGTMEKYLPAAAEKPTEKMSTSDSRCSS : 240
      *      260     *      280     *      300     *      320
AT5G63790.1 : HVISPDVTCSDNWEVESEPKWINLEDALEAFNDDTSMFSSIGLLQNDADFVPQFQYQSSDFVDSFQDPEQKPFLLNWNFAF : 310
AT5G63790.2 : HVISPDVTCSDNWEVESEPKWINLEDALEAFNDDTSMFSSIGLLQNDADFVPQFQYQSSDFVDSFQDPEQKPFLLNWNFAF : 320
      *      340     *      360     *      380     *      400
AT5G63790.1 : QG : 312
AT5G63790.2 : QG : 322
      *      420     *      440     *      460     *      480
AT5G63790.1 : QG : 312
AT5G63790.2 : QG : 322

```

**Figure S1. Alignment of two NAC102 isoforms**

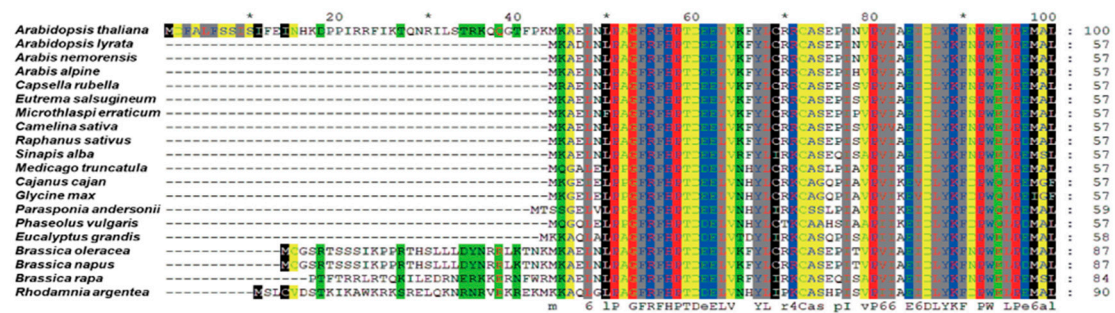

**Figure S2. Alignment of NAC102 orthologs**

The N-Terminal sequences of NAC102 orthologs from *Arabidopsis thaliana* (NP\_201184.2), *Arabidopsis lyrata* (XP\_002866576.1), *Arabis nemorensis* (VVB17923.1), *Arabis alpine* (KFK28073.1), *Capsella rubella* (XP\_006280952.1), *Eutrema salsugineum* (XP\_006394242.1), *Microthlaspi erraticum* (CAA7034898.1), *Camelina sativa* (XP\_010460978.1), *Raphanus sativus* (XP\_018439406.1), *Sinapis alba* (KAF8081687.1), *Medicago truncatula* (RHN43155.1), *Cajanus cajan* (KYP61874.1), *Glycine max* (NP\_001341065.1), *Parasponia andersonii* (PON61827.1), *Phaseolus vulgaris* (XP\_007159873.1), *Eucalyptus grandis* (KCW54084.1), *Brassica oleracea* (VDD27371.1), *Brassica napus* (CDY39846.1), *Brassica rapa* (VDC78532.1), and *Rhodamnia argentea* (XP\_030551358.1) were aligned using ClustalW.

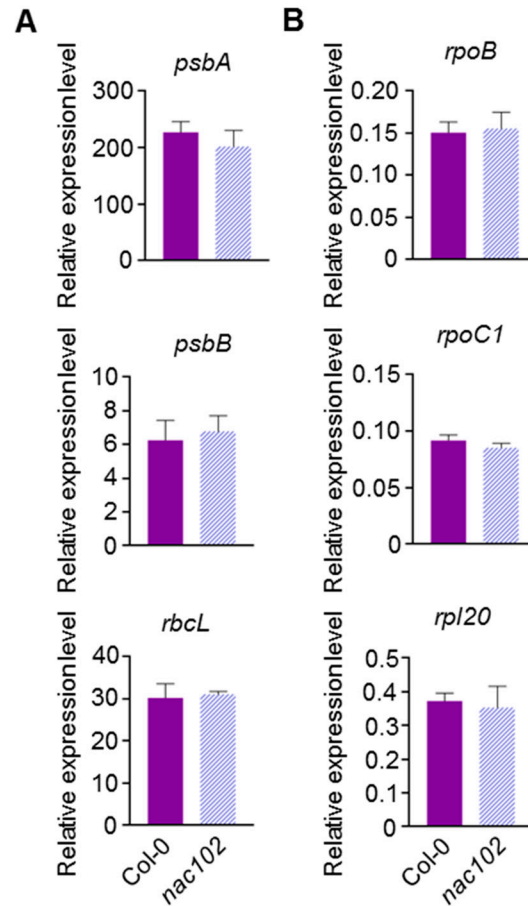

**Figure S3. The chloroplast gene expression in the *nac102* mutant**

The relative expression levels of the chloroplast genes were determined by qRT-PCR analysis using *EF1 $\alpha$*  as the normalizer. (A) The PEP-dependent genes. (B) The NEP-dependent genes. Data represent mean  $\pm$  SD ( $n = 3$ ). The statistical significances were determined using Student's t-test (\* $p < 0.05$ , \*\* $p < 0.01$ , and \*\*\* $p < 0.001$ ).

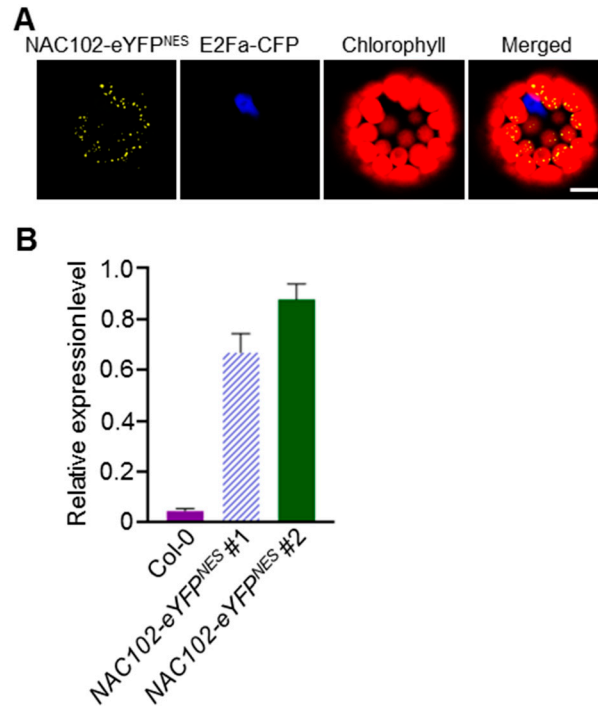

**Figure S4. Construction of *NAC102-eYFP<sup>NES</sup>* overexpression lines**

(A) Subcellular localization of the *NAC102-eYFP<sup>NES</sup>*. The fusion proteins were transiently expressed in *Arabidopsis* protoplasts. E2Fa-CFP was used as the nucleus marker and the chlorophyll fluorescence was used as the chloroplast marker. The pictures were captured using confocal microscopy. Bar = 10  $\mu$ m.

(B) The relative expression levels of *NAC102* in Col-0 and the *NAC102-eYFP<sup>NES</sup>* transgenic lines were determined by qPCR using *EF1 $\alpha$*  as the normalizer. The data are represented as means  $\pm$  SD (n = 3).

**Table S1. List of primers used in this study**

| Primer name                       | Sequence (5'-3')                                            | Applications    |
|-----------------------------------|-------------------------------------------------------------|-----------------|
| NAC102-eYFP F1                    | CAATTACATTTACAATTACCATGGACTTTGCTC<br>TCTTCTC                | Fusion proteins |
| NAC102-eYFP F2                    | CAATTACATTTACAATTACCATGAACCTCCCCT<br>TCGTTTA                |                 |
| NAC102-eYFP R1                    | TGGGCCGCGCCGGAGCCGCGCCGCGCCTG<br>GCCCTTGAGGAGCAAAATTCC      |                 |
| eYFP F1                           | CCAGGCGGCGGCGGCTCCGGCGGCGGCCC<br>AGTGAGCAAGGGCGAGGAGCT      | Fusion proteins |
| eYFP R                            | CCGGGTCTTAATTAAGTCTCTAGATTACTTGTA<br>CAGCTCGTCCA            |                 |
| NAC102-eYFP <sup>NES</sup><br>R1  | TTAGTCTAAAGTGAGGCGCTCAAGTGGAGGG<br>AGACACTTGACAGCTCGTCCATGC | Fusion proteins |
| NAC102-eYFP <sup>NES</sup><br>R2  | CCGGGTCTTAATTAAGTCTCTAGATTAGTCTAA<br>AGTGAGGCGCT            |                 |
| NAC102 <sup>ΔN43</sup><br>-eYFP F | CAATTACATTTACAATTACCATGAAGGCGGAG<br>TTGAATTT                | Fusion proteins |
| NAC102 <sup>N43</sup> -eYFP<br>R  | AGCTCCTCGCCCTTGCTCACTTTTGGAAG<br>TACCTTGTT                  | Fusion proteins |
| NAC102 <sup>N60</sup> -eYFP<br>R  | AGCTCCTCGCCCTTGCTCACGTCCGTCGGAT<br>GAAATCGGA                | Fusion proteins |
| NAC102 <sup>N80</sup> -eYFP<br>R  | AGCTCCTCGCCCTTGCTCACCGGAACGTTAA<br>TCGGTTCTG                | Fusion proteins |
| eYFP F2                           | GTGAGCAAGGGCGAGGAGCT                                        | Fusion proteins |
| EF1α-qPCR F                       | AAATACTCCAAGGCTAGGTACG                                      | qPCR            |
| EF1α-qPCR R                       | AAATGGGATTTTGTGAGGGTTG                                      |                 |
| NAC102-qPCR F                     | GAGATGTGCGTCAGAACCGA                                        | qPCR            |
| NAC102-qPCR R                     | TTTCTCACCGTACAACGCCA                                        |                 |
| psbA-qPCR F                       | TGAGCACAACATTCTTATGCAC                                      | qPCR            |
| psbA-qPCR R                       | AGTTACCAAGGAACCATGCATA                                      |                 |
| psbB-qPCR F                       | GTTTTGGCGCATTTCATGTAAC                                      | qPCR            |
| psbB-qPCR R                       | TGGAATAGGCCCGCTAATATAC                                      |                 |
| rbcL-qPCR F                       | TCTGGTGGAGATCATATTCACG                                      | qPCR            |
| rbcL-qPCR R                       | ATCATCTCCAAAGATCTCGGTC                                      |                 |
| rpoB-qPCR F                       | GCGAATCGAGCTTTAATGAGTT                                      | qPCR            |
| rpoB-qPCR R                       | AAACGATCTTCTCAGTGTGAGT                                      |                 |
| rpoC1-qPCR F                      | GTGCTATCCGAGAACAATTAGC                                      | qPCR            |
| rpoC1-qPCR R                      | GACATAAAACCATCCATTCGGG                                      |                 |
| rpl20-qPCR F                      | TATTTGCATCAAGCTTTCGAGG                                      | qPCR            |
| rpl20-qPCR R                      | TGATCCATAAACGGCGAAAATC                                      |                 |
| NAC102 BD F                       | CTCAGAGGAGGACCTGCATATGGACTTTGCT<br>CTCTTCTC                 | Y2H             |
| NAC102 BD R                       | CTAGTTATGCGGCCGCTGCAGCCCTTGAGGA                             |                 |

|             |                                                 |     |
|-------------|-------------------------------------------------|-----|
|             | GCAAAATTCC                                      |     |
| rpoA AD F   | ACGTACCAGATTACGCTCATATGGTTTCGAGAG<br>AAAGTCAA   | Y2H |
| rpoA AD R   | CAGTATCTACGATTCATCTGCAGTTTTTTTTCT<br>AGAATGTCTA |     |
| rpoB AD F   | ACGTACCAGATTACGCTCATATGCTTGGGGAT<br>GAAAAAGA    | Y2H |
| rpoB AD R   | CAGTATCTACGATTCATCTGCAGAACTTCCTT<br>CCTATTAATCT |     |
| rpoC1 AD F  | ACGTACCAGATTACGCTCATATGATCGATCGG<br>TATAAACA    | Y2H |
| rpoC1 AD R  | CAGTATCTACGATTCATCTGCAGGGTATCATAT<br>GAACAGGCTT |     |
| rpoC2 AD F  | ACGTACCAGATTACGCTCATATGGCGGAACG<br>GGCCAATCT    | Y2H |
| rpoC2 AD R  | CAGTATCTACGATTCATCTGCAGAATCCTAGA<br>AAAGTCAGATT |     |
| rpoTp AD F  | ACGTACCAGATTACGCTCATATGGCTTCCGCT<br>GCGGCGGC    | Y2H |
| rpoTp AD R  | CAGTATCTACGATTCATCTGCAGGTTGAAGAA<br>GTACTGTGATT |     |
| rpoTmp AD F | ACGTACCAGATTACGCTCATATGTCCAGTGCT<br>CAAACCCC    | Y2H |
| rpoTmp AD R | CAGTATCTACGATTCATCTGCAGGTTGAAGAA<br>ATAAGGTGAAT |     |

---
